# Supplementary material for: Hierarchical symmetry transfer and flexible charge matching in five [M(phen)3]2+directed iodoargentates with 1 to 3D frameworks
Source: Royal Society of Chemistry journal article supplement (doi:10.1039/c5ce01692d), 2015-01-01
Supplement: c5ce01692d1.pdf [file c5ce01692d1.pdf]

# Hierarchically Symmetric Transfer and Flexible Charge Matching in Five $[M(\text{phen})_3]^{2+}$ Directed Iodoargentates with 1- to 3-D Framework

Tan-Lai Yu, Yang-Bo Fu, Yi-Lin Wang, Peng-Fei Hao, Jun-Ju Shen and Yun-Long Fu\*

School of Chemistry & Material Science, Shanxi Normal University, Linfen 041004, P. R. China Fax & Tel : Int. code +86 357 2053716; E-mail: yunlongfu@dns.sxnu.edu.cn

Supporting Information (SI)

**Table S1.** Crystallographic data and refinement parameters of 1-5.

| Compound                                                                                     | 1-293K                                                                                       | 2-100K                                                                                       | 2-293K                                                                                       |
|----------------------------------------------------------------------------------------------|----------------------------------------------------------------------------------------------|----------------------------------------------------------------------------------------------|----------------------------------------------------------------------------------------------|
| CCDC code                                                                                    | 922390                                                                                       | 1013715                                                                                      | 1415302                                                                                      |
| Temperature                                                                                  | 293(2) K                                                                                     | 100(2) K                                                                                     | 293(2) K                                                                                     |
| Empirical formula                                                                            | $\text{C}_{40}\text{H}_{30}\text{N}_8\text{CoAg}_3\text{I}_5$                                | $\text{C}_{72}\text{H}_{50}\text{N}_{12}\text{OC}_2\text{O}_2\text{Ag}_{11}\text{I}_{15}$    | $\text{C}_{144}\text{H}_{100}\text{Co}_4\text{N}_{24}\text{O}_2\text{Ag}_{24}\text{I}_{33}$  |
| Formula weight                                                                               | 1639.76                                                                                      | 4307.17                                                                                      | 9210.77                                                                                      |
| Crystal size (mm)                                                                            | $0.25 \times 0.12 \times 0.08$                                                               | $0.20 \times 0.11 \times 0.09$                                                               | $0.19 \times 0.13 \times 0.06$                                                               |
| Crystal system,                                                                              | Monoclinic                                                                                   | Hexagonal                                                                                    | Hexagonal                                                                                    |
| space group                                                                                  | $P2_1/c$                                                                                     | $P6_3/m$                                                                                     | $P6_3/m$                                                                                     |
| <i>a</i> (Å)                                                                                 | 15.3138(7)                                                                                   | 14.8002(16)                                                                                  | 14.8402(4)                                                                                   |
| <i>b</i> (Å)                                                                                 | 23.0323(6)                                                                                   | 14.8002(16)                                                                                  | 14.8402(4)                                                                                   |
| <i>c</i> (Å)                                                                                 | 14.3495(6)                                                                                   | 24.789(3)                                                                                    | 24.9918(8)                                                                                   |
| $\alpha$ (°)                                                                                 | 90                                                                                           | 90                                                                                           | 90                                                                                           |
| $\beta$ (°)                                                                                  | 115.858(5)                                                                                   | 90                                                                                           | 90                                                                                           |
| $\gamma$ (°)                                                                                 | 90                                                                                           | 120                                                                                          | 120                                                                                          |
| Volume (Å <sup>3</sup> )                                                                     | 4554.5(4)                                                                                    | 4702.4(11)                                                                                   | 4766.6(2)                                                                                    |
| <i>Z</i>                                                                                     | 4                                                                                            | 2                                                                                            | 1                                                                                            |
| <i>D<sub>c</sub></i> (g cm <sup>-3</sup> )                                                   | 2.391                                                                                        | 3.042                                                                                        | 3.209                                                                                        |
| <i>F</i> (000)                                                                               | 3036                                                                                         | 3880                                                                                         | 4133                                                                                         |
| $\mu$ (mm <sup>-1</sup> )                                                                    | 5.057                                                                                        | 7.547                                                                                        | 8.132                                                                                        |
| Reflections collected                                                                        | 18473                                                                                        | 10059                                                                                        | 10820                                                                                        |
| Unique reflections                                                                           | 8945                                                                                         | 3168                                                                                         | 3209                                                                                         |
| <i>R<sub>int</sub></i>                                                                       | 0.0280                                                                                       | 0.0441                                                                                       | 0.0299                                                                                       |
| Goodness-of-fit on <i>F</i> <sup>2</sup>                                                     | 1.021                                                                                        | 1.288                                                                                        | 1.156                                                                                        |
| <i>R</i> <sub>1</sub> / <i>wR</i> <sub>2</sub> , [ <i>I</i> ≥ 2σ( <i>I</i> )] <sup>a,b</sup> | 0.0484, 0.0965                                                                               | 0.1329, 0.2941                                                                               | 0.0724, 0.2319                                                                               |
| <i>R</i> <sub>1</sub> / <i>wR</i> <sub>2</sub> , (all data)                                  | 0.0759, 0.1101                                                                               | 0.1406, 0.2981                                                                               | 0.0901, 0.2486                                                                               |
| $\Delta\rho_{\text{max}}/\Delta\rho_{\text{min}}$ (e Å <sup>-3</sup> )                       | 1.895, -1.896                                                                                | 3.343, -9.947                                                                                | 2.365, -4.083                                                                                |
|                                                                                              | <b>3-293K</b>                                                                                | <b>4-100K</b>                                                                                | <b>4-293K</b>                                                                                |
|                                                                                              | <b>5-293K</b>                                                                                |                                                                                              |                                                                                              |
| 1414140                                                                                      | 1013716                                                                                      | 1415303                                                                                      | 1414141                                                                                      |
| 293(2) K                                                                                     | 100(2) K                                                                                     | 293(2) K                                                                                     | 293(2) K                                                                                     |
| $\text{C}_{144}\text{H}_{100}\text{Cu}_4\text{N}_{24}\text{O}_2\text{Ag}_{24}\text{I}_{33}$  | $\text{C}_{72}\text{H}_{78}\text{N}_{12}\text{Co}_2\text{O}_{15}\text{Ag}_{13}\text{I}_{17}$ | $\text{C}_{72}\text{H}_{78}\text{N}_{12}\text{Co}_2\text{O}_{15}\text{Ag}_{14}\text{I}_{17}$ | $\text{C}_{72}\text{H}_{78}\text{N}_{12}\text{Cd}_2\text{O}_{15}\text{Ag}_{14}\text{I}_{17}$ |
| 2393.47                                                                                      | 5028.93                                                                                      | 5136.8                                                                                       | 5243.74                                                                                      |
| $0.22 \times 0.18 \times 0.06$                                                               | $0.25 \times 0.23 \times 0.07$                                                               | $0.20 \times 0.19 \times 0.15$                                                               | $0.30 \times 0.28 \times 0.20$                                                               |
| Hexagonal                                                                                    | Cubic                                                                                        | Cubic                                                                                        | Cubic                                                                                        |
| $P6_3/m$                                                                                     | $P2_13$                                                                                      | $I2_13$                                                                                      | $I2_13$                                                                                      |

|                |                |                |                |
|----------------|----------------|----------------|----------------|
| 14.868(3)      | 22.7105(5)     | 22.8119(3)     | 22.9931(2)     |
| 14.868(3)      | 22.7105(5)     | 22.8119(3)     | 22.9931(2)     |
| 25.012(4)      | 22.7105(5)     | 22.8119(3)     | 22.9931(2)     |
| 90             | 90             | 90             | 90             |
| 90             | 90             | 90             | 90             |
| 120            | 90             | 90             | 90             |
| 4788.2(14)     | 11713.4(8)     | 11870.9(5)     | 12156.05(18)   |
| 1              | 4              | 4              | 4              |
| 3.201          | 2.852          | 2.874          | 2.865          |
| 4141           | 9120           | 9308           | 9476           |
| 8.193          | 6.929          | 6.998          | 6.910          |
| 10452          | 11489          | 5377           | 5893           |
| 3225           | 6113           | 3339           | 3402           |
| 0.0590         | 0.0534         | 0.0281         | 0.0264         |
| 1.033          | 1.056          | 1.103          | 1.077          |
| 0.1696, 0.3761 | 0.0675, 0.1574 | 0.0740, 0.2075 | 0.0820, 0.2293 |
| 0.2204, 0.4104 | 0.1182, 0.1784 | 0.1064, 0.2366 | 0.1121, 0.2676 |
| 2.874, -4.242  | 3.597, -1.739  | 2.678, -4.314  | 3.292, -4.318  |

$${}^a R_1 = \sum |F_o| - |F_c| / \sum |F_o|, {}^b wR_2 = [\sum w(F_o^2 - F_c^2)^2 / \sum w(F_o^2)^2]^{1/2}$$

**Table. S2** Selected bond lengths (Å) and angles (°) for **1-5**.

| Compound 1-293K     |            |                     |            |
|---------------------|------------|---------------------|------------|
| Ag(1)-I(1)          | 2.6992(11) | Ag(1)-I(5)#1        | 3.0165(12) |
| Ag(1)-I(2)          | 3.0075(11) | Ag(1)-I(6)#1        | 3.0639(12) |
| Ag(2)-I(6)#1        | 2.8515(10) | Ag(2)-I(4)          | 2.7383(11) |
| Ag(2)-I(5)#1        | 3.0460(13) | Ag(2)-I(2)          | 2.9633(11) |
| Ag(3)-I(5)          | 2.8524(10) | Ag(3)-I(2)          | 2.8847(10) |
| Ag(3)-I(4)          | 2.8537(10) | Ag(3)-I(6)          | 2.9349(9)  |
| Ag(1)-Ag(2)         | 2.8720(12) |                     |            |
| I(1)-Ag(1)-I(2)     | 107.11(4)  | I(1)-Ag(1)-I(5)#1   | 129.52(4)  |
| I(2)-Ag(1)-I(5)#1   | 95.27(3)   | I(2)-Ag(1)-I(6)#1   | 105.28(3)  |
| I(1)-Ag(1)-I(6)#1   | 124.97(4)  | I(5)#1-Ag(1)-I(6)#1 | 89.49(3)   |
| I(4)-Ag(2)-I(5)#1   | 133.14(5)  | I(4)-Ag(2)-I(6)#1   | 116.60(4)  |
| I(6)#1-Ag(2)-I(5)#1 | 93.02(3)   | I(4)-Ag(2)-I(2)     | 104.44(3)  |
| I(2)-Ag(2)-I(5)#1   | 95.57(3)   | I(6)#1-Ag(2)-I(2)   | 112.17(4)  |
| I(5)-Ag(3)-I(2)     | 121.02(3)  | I(5)-Ag(3)-I(6)     | 95.39(3)   |
| I(4)-Ag(3)-I(2)     | 103.57(3)  | I(4)-Ag(3)-I(6)     | 122.64(3)  |
| I(5)-Ag(3)-I(4)     | 115.53(3)  | I(2)-Ag(3)-I(6)     | 98.76(3)   |
| Compound 2-100K     |            |                     |            |
| Ag(1)-I(1)          | 2.799(6)   | Ag(3)-I(5)#3        | 3.014(5)   |
| Ag(1)-I(2)          | 2.862(5)   | Ag(3)-I(4)          | 2.837(5)   |
| Ag(1)-I(3)#1        | 2.936(4)   | Ag(3)-I(5)          | 2.861(5)   |
| Ag(1)-I(2)#1        | 2.862(5)   | Ag(2B)-I(3)         | 2.925(12)  |

|                    |            |                     |            |
|--------------------|------------|---------------------|------------|
| Ag(1)-I(3)         | 2.936(4)   | Ag(2B)-I(1)#2       | 2.595(18)  |
| Ag(2)-I(3)         | 2.834(7)   | Ag(2B)-I(3)#1       | 2.925(12)  |
| Ag(2)-I(5)#3       | 3.259(10)  | Ag(3B)-I(5)         | 2.668(13)  |
| Ag(2)-I(1)#2       | 2.811(10)  | Ag(3B)-I(3)#1       | 2.852(8)   |
| Ag(2)-I(3)#1       | 2.834(7)   | Ag(3B)-I(5)#3       | 2.684(13)  |
| Ag(3)-I(3)         | 2.850(5)   | Ag(3B)-I(3)         | 2.852(8)   |
| Ag(1)-Ag(2)        | 3.213(11)  | Ag(1)-Ag(2B)        | 2.97(2)    |
| Ag(3)-Ag(3)#4      | 3.045(8)   | Ag(3)-Ag(3)#3       | 3.045(8)   |
| Ag(2B)-Ag(3B)      | 3.15(2)    |                     |            |
| I(1)-Ag(1)-I(2)#1  | 113.56(18) | I(1)-Ag(1)-I(2)     | 113.56(18) |
| I(2)#1-Ag(1)-I(3)  | 109.7(2)   | I(1)-Ag(1)-I(3)     | 116.58(12) |
| I(1)-Ag(1)-I(3)#1  | 116.58(12) | I(2)-Ag(1)-I(3)     | 99.3(2)    |
| I(2)-Ag(1)-I(3)#1  | 109.7(2)   | I(2)#1-Ag(1)-I(3)#1 | 99.3(2)    |
| I(5)#3-Ag(3B)-I(3) | 105.8(3)   | I(3)-Ag(1)-I(3)#1   | 99.01(17)  |
| I(3)#1-Ag(3B)-I(3) | 103.0(4)   |                     |            |

---

Compound 3-293K

---

|                     |            |                     |            |
|---------------------|------------|---------------------|------------|
| Ag(1)-I(6)          | 2.114(7)   | Ag(3)-I(5)          | 2.876(3)   |
| Ag(1)-I(2)#5        | 3.035(3)   | Ag(2)-I(4)#6        | 2.807(6)   |
| Ag(2)-I(6)          | 2.517(17)  | Ag(2)-I(3)#2        | 2.837(4)   |
| Ag(2)-I(2)#5        | 3.262(5)   | Ag(2')-I(3)#2       | 2.853(5)   |
| Ag(2')-I(4)#6       | 2.685(8)   | Ag(2')-I(6)         | 3.007(17)  |
| Ag(3)-I(3)#2        | 2.9389(19) | Ag(3)-I(5)          | 2.876(3)   |
| Ag(1)-Ag(1)#5       | 3.133(4)   | Ag(3)-Ag(2)         | 3.308(5)   |
| Ag(1)-Ag(1)#1       | 3.133(4)   | Ag(3)-Ag(2')        | 2.920(7)   |
| I(6)-Ag(1)-I(3)     | 69.0(3)    | I(6)-Ag(1)-I(2)#5   | 56.8(3)    |
| I(6)-Ag(1)-I(2)     | 66.7(4)    | I(3)-Ag(1)-I(2)#5   | 99.51(11)  |
| I(3)-Ag(1)-I(2)     | 109.94(8)  | I(2)-Ag(1)-I(2)#5   | 98.37(9)   |
| I(6)-Ag(1)-I(1)     | 165.6(3)   | I(1)-Ag(1)-I(2)#5   | 109.46(8)  |
| I(3)-Ag(1)-I(1)     | 121.17(10) | I(2)-Ag(1)-I(1)     | 114.72(11) |
| I(6)-Ag(2)-I(4)#6   | 160.9(3)   | I(3)-Ag(2)-I(3)#2   | 103.04(18) |
| I(6)-Ag(2)-I(3)     | 64.44(17)  | I(6)-Ag(2)-I(2)#5   | 51.1(3)    |
| I(4)#6-Ag(2)-I(3)   | 123.67(11) | I(4)#6-Ag(2)-I(2)#5 | 109.83(15) |
| I(6)-Ag(2)-I(3)#2   | 64.44(17)  | I(3)-Ag(2)-I(2)#5   | 94.45(12)  |
| I(4)#6-Ag(2)-I(3)#2 | 123.67(11) | I(3)#2-Ag(2)-I(2)#5 | 94.45(12)  |
| I(4)-Ag(3)-I(5)     | 113.80(9)  | I(4)-Ag(3)-I(3)     | 117.91(9)  |
| I(4)-Ag(3)-I(3)#2   | 117.91(9)  | I(5)-Ag(3)-I(3)     | 103.32(9)  |
| I(5)-Ag(3)-I(3)#2   | 103.32(9)  | I(3)#2-Ag(3)-I(3)   | 98.17(8)   |

---

Compound 4-100K

---

|              |           |              |            |
|--------------|-----------|--------------|------------|
| Ag(1)-I(2)#1 | 2.9004(6) | Ag(1)-I(2)#2 | 2.9004(6)  |
| Ag(1)-I(2)   | 2.9004(6) | Ag(1)-I(1)   | 2.9352(14) |
| Ag(2)-I(5)   | 2.7832(9) | Ag(2)-I(4)   | 2.8556(9)  |
| Ag(2)-I(2)#1 | 2.8488(9) | Ag(2)-I(2)   | 2.8917(9)  |
| Ag(3)-I(3)   | 2.7818(9) | Ag(3)-I(2)   | 2.9017(9)  |
| Ag(3)-I(1)   | 2.8642(7) | Ag(3)-I(4)   | 2.9207(8)  |

|                     |            |                    |            |
|---------------------|------------|--------------------|------------|
| Ag(4)-I(7)#3        | 2.7733(8)  | Ag(4)-I(3)         | 2.8624(9)  |
| Ag(4)-I(7)          | 2.7999(9)  | Ag(4)-I(4)         | 2.9723(9)  |
| Ag(5)-I(6)          | 2.7991(8)  | Ag(5')-I(7)        | 2.768(4)   |
| Ag(5)-I(7)          | 2.8215(9)  | Ag(5')-I(6)        | 2.772(4)   |
| Ag(5)-I(5)          | 2.8291(9)  | Ag(5')-I(5)        | 2.805(3)   |
| Ag(5)-I(4)          | 3.0537(9)  | Ag(5')-I(4)#4      | 3.096(4)   |
| Ag(1)-Ag(2)#1       | 3.0670(8)  | Ag(1)-Ag(3)        | 3.2247(9)  |
| Ag(1)-Ag(2)         | 3.0670(8)  | Ag(1)-Ag(3)#1      | 3.2247(9)  |
| Ag(1)-Ag(2)#2       | 3.0670(8)  | Ag(1)-Ag(3)#2      | 3.2247(9)  |
| Ag(2)-Ag(5)         | 2.9193(10) | Ag(2)-Ag(3)        | 3.2537(10) |
| Ag(3)-Ag(4)         | 2.9790(9)  | Ag(4)-Ag(5)        | 3.2631(10) |
| I(2)#1-Ag(1)-I(2)   | 111.13(2)  | I(2)#1-Ag(1)-I(1)  | 107.76(2)  |
| I(2)#1-Ag(1)-I(2)#2 | 111.13(2)  | I(2)-Ag(1)-I(1)    | 107.76(2)  |
| I(2)-Ag(1)-I(2)#2   | 111.13(2)  | I(2)#2-Ag(1)-I(1)  | 107.76(2)  |
| I(5)-Ag(2)-I(2)#1   | 105.75(3)  | I(5)-Ag(2)-I(2)    | 109.26(3)  |
| I(5)-Ag(2)-I(4)     | 116.19(3)  | I(2)#1-Ag(2)-I(2)  | 112.90(3)  |
| I(2)#1-Ag(2)-I(4)   | 102.41(3)  | I(4)-Ag(2)-I(2)    | 110.20(3)  |
| I(3)-Ag(3)-I(4)     | 113.12(3)  | I(3)-Ag(3)-I(1)    | 115.99(3)  |
| I(1)-Ag(3)-I(4)     | 99.82(2)   | I(3)-Ag(3)-I(2)    | 109.57(3)  |
| I(2)-Ag(3)-I(4)     | 108.11(3)  | I(1)-Ag(3)-I(2)    | 109.68(3)  |
| I(7)#3-Ag(4)-I(7)   | 123.04(3)  | I(7)#3-Ag(4)-I(4)  | 99.95(3)   |
| I(7)#3-Ag(4)-I(3)   | 105.32(3)  | I(7)-Ag(4)-I(4)    | 109.09(3)  |
| I(7)-Ag(4)-I(3)     | 109.34(3)  | I(3)-Ag(4)-I(4)    | 109.29(3)  |
| I(7)-Ag(5)-I(4)     | 106.29(3)  | I(6)-Ag(5)-I(7)    | 115.94(3)  |
| I(5)-Ag(5)-I(4)     | 108.86(3)  | I(7)-Ag(5)-I(5)    | 110.31(3)  |
| I(6)-Ag(5)-I(5)     | 117.12(3)  | I(6)-Ag(5)-I(4)    | 96.65(3)   |
| I(7)-Ag(5')-I(6)    | 118.65(13) | I(7)-Ag(5')-I(4)#4 | 97.13(11)  |
| I(7)-Ag(5')-I(5)    | 112.63(13) | I(6)-Ag(5')-I(4)#4 | 96.26(11)  |
| I(6)-Ag(5')-I(5)    | 118.85(13) | I(5)-Ag(5')-I(4)#4 | 108.41(12) |

---

Compound 5-293K

---

|                     |            |                   |            |
|---------------------|------------|-------------------|------------|
| Ag(1)-I(3)#8        | 2.8872(11) | Ag(1)-I(4)        | 2.966(3)   |
| Ag(1)-I(3)#5        | 2.8872(11) | Ag(2)-I(1)        | 2.8964(16) |
| Ag(2)-I(3)#8        | 2.8741(16) | Ag(2)-I(2)        | 2.8006(16) |
| Ag(3)-I(1)          | 3.0269(19) | Ag(3)-I(2)        | 2.7692(19) |
| Ag(3)-I(4)#1        | 2.8379(18) | Ag(3')-I(4)#1     | 2.809(2)   |
| Ag(3)-I(3)#9        | 2.8758(19) | Ag(3')-I(1)#10    | 3.027(3)   |
| Ag(3')-I(3)#9       | 2.796(3)   | Ag(1)-Ag(2)#8     | 3.1058(16) |
| Ag(1)-Ag(2)#5       | 3.1058(16) | Ag(1)-Ag(3)#1     | 3.178(2)   |
| Ag(1)-Ag(3)#4       | 3.178(2)   | Ag(2)-Ag(3)       | 2.926(2)   |
| Ag(2)-Ag(3)#1       | 3.346(2)   | Ag(2)-Ag(1)       | 3.1058(16) |
| Ag(3)-Ag(2)#1       | 3.346(2)   | Ag(3)-Ag(1)#1     | 3.178(2)   |
| I(3)#8-Ag(1)-I(3)   | 110.58(6)  | I(3)#8-Ag(1)-I(4) | 108.34(6)  |
| I(3)#8-Ag(1)-I(3)#5 | 110.58(6)  | I(3)-Ag(1)-I(4)   | 108.34(6)  |
| I(3)-Ag(1)-I(3)#5   | 110.58(6)  | I(3)#5-Ag(1)-I(4) | 108.34(6)  |

|                   |           |                   |           |
|-------------------|-----------|-------------------|-----------|
| I(2)-Ag(2)-I(3)   | 107.97(5) | I(2)-Ag(2)-I(1)   | 113.58(5) |
| I(2)-Ag(2)-I(3)#8 | 112.31(5) | I(3)-Ag(2)-I(1)   | 101.58(5) |
| I(3)-Ag(2)-I(3)#8 | 111.47(5) | I(3)#8-Ag(2)-I(1) | 109.44(5) |
| I(2)-Ag(3)-I(1)   | 110.58(6) | I(3)#9-Ag(3)-I(1) | 105.87(6) |
| I(4)#1-Ag(3)-I(1) | 98.74(5)  |                   |           |

Symmetry code: for **1**: #1  $x, -y+3/2, z-1/2$ ; #2  $x, -y+3/2, z+1/2$ ; for **2**: #1  $x, y, -z+3/2$ ; #2  $-y+1, x-y, z$ ; #3  $-x+y, -x, z$ ; #4  $-y, x-y, z$ ; #5  $-x+y+1, -x+1, z$ ; #6  $-y, x-y, -z+3/2$ ; #7  $-y+1, x-y+1, z$ ; #8  $-x+y, -x+1, z$ ; for **3**: #1  $-x+y, -x, z$ ; #2  $x, y, -z+1/2$ ; #3  $-x+y, -x, -z+1/2$ ; #4  $-y+1, x-y+1, z$ ; #5  $-y, x-y, z$ ; #6  $-x+y, -x+1, z$ ; for **4**: #1  $z, x, y$ ; #2  $y, z, x$ ; #3  $-z+1/2, -x, y+1/2$ ; #4  $-y, z-1/2, -x+1/2$ ; #5  $-z+1/2, -x+1, y-1/2$ ; #6  $-y+1, z+1/2, -x+1/2$ ; for **5**: #1  $-x+2, -y+1/2, z+0$ ; #2  $-y+1, -z+1/2, x-1$ ; #3  $y+1, z, x-1$ ; #4  $-z+1, -x+3/2, y+0$ ; #5  $y+1/2, -z+1/2, -x+1$ ; #6  $z, x-1, y+1$ ; #7  $y+1, z-1, x$ ; #8  $-z+1, x-1/2, -y+1/2$ ; #9  $z+1, -x+1, -y+1/2$ ; #10  $z+1, x-1, y$ ;

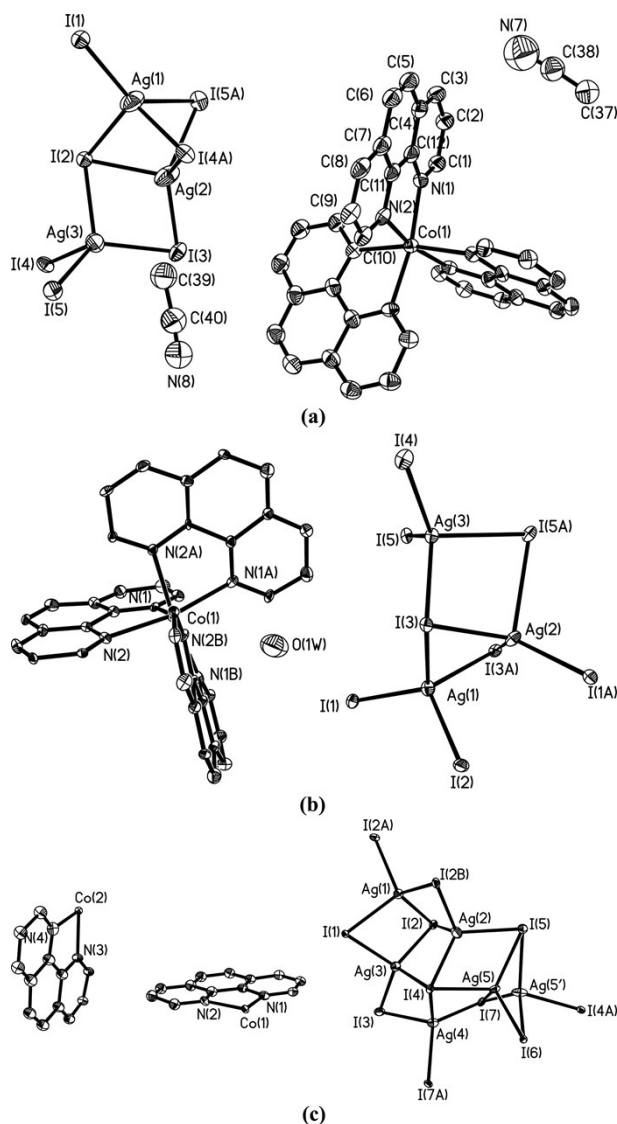

**Figure. S1** The asymmetric unit diagram of **1(a)** **2 (b)** and **4 (c)**.

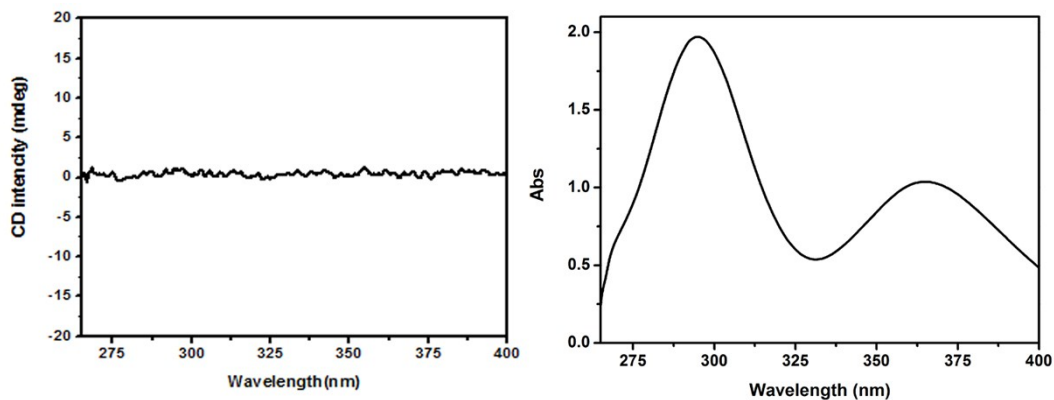

**Figure S2.** The CD spectra of compound **4** in the DMSO solution.

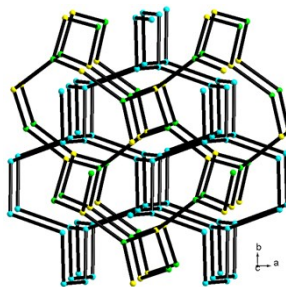

**Figure S3.** View of the two different (10, 3) topological network of the 3-D  $[\text{Ag}_{13}\text{I}_{17}]_n^{4n-}$  framework and cationic supramolecular 3-D network of  $[\text{Co}(\text{phen})_3]^{2+}$  with contrary four-fold interpenetration helical chains which reveals obvious image relationship. (The cyan, yellow and green dots represent the unit  $[\text{Co}(\text{phen})_3]^{2+}$ ,  $\text{Ag}_6\text{I}_3$  and  $\text{Ag}_7\text{I}_3$  cores respectively. The black lines represent the contrary four-fold helical chains.)

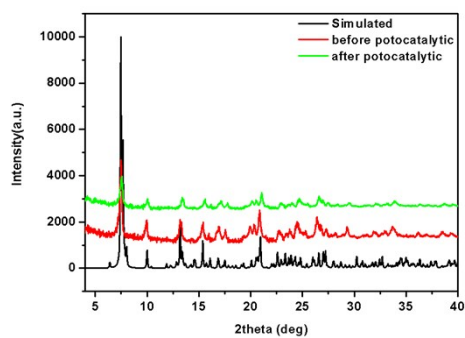

**Compound 1**

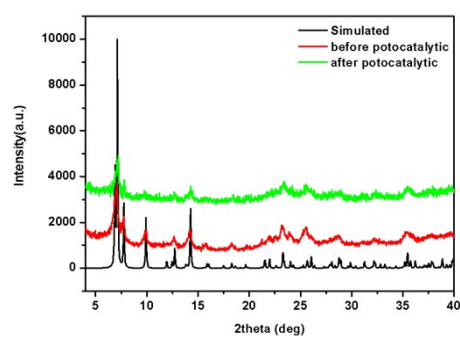

**Compound 2**

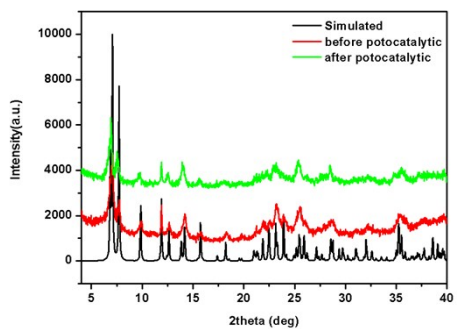

**Compound 3**

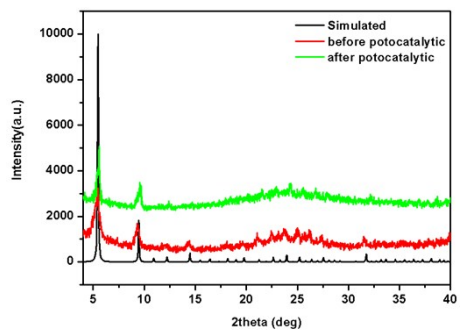

**Compound 4**

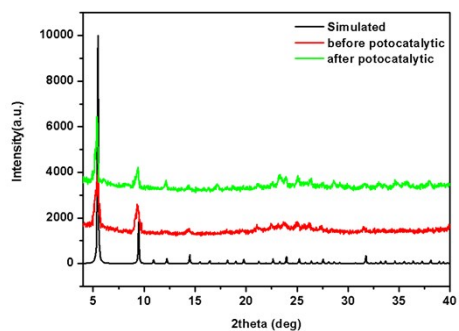

Compound 5

**Figure S4.** Experimental XRD patterns of compound 1-5 exposed in air (red), after photocatalytic (green) and simulation patterns of compound 1 -5 (black).

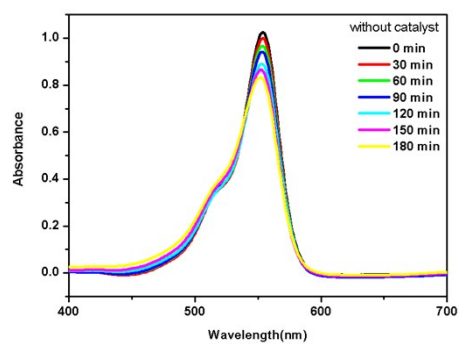

Without catalyst

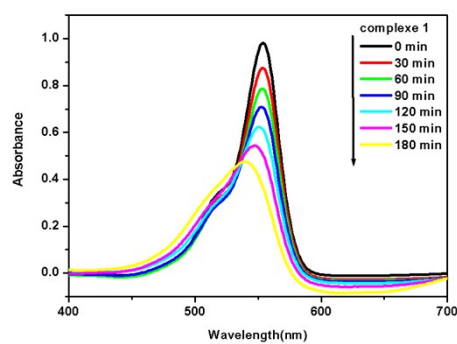

Compound 1

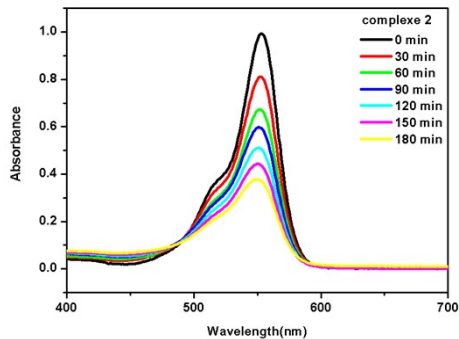

Compound 2

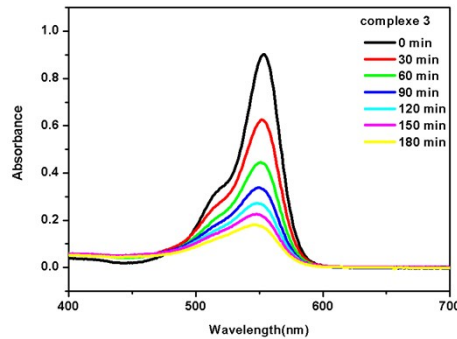

Compound 3

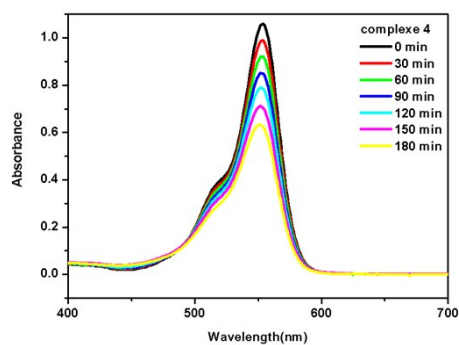

Compound 4

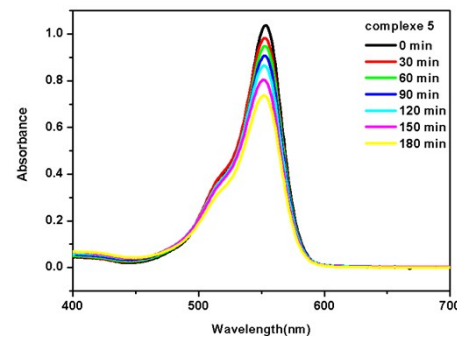

Compound 5

**Figure S5.** Absorption spectra of the RhB aqueous solution under 175-W Hg-lamp irradiation with no catalyst and compounds 2 – 5.

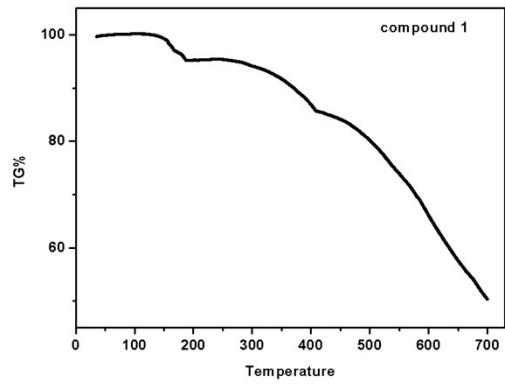

Compound 1

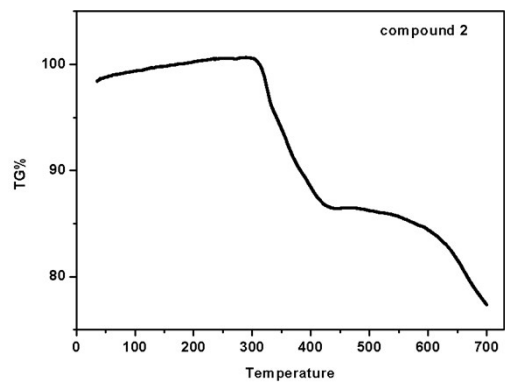

Compound 2

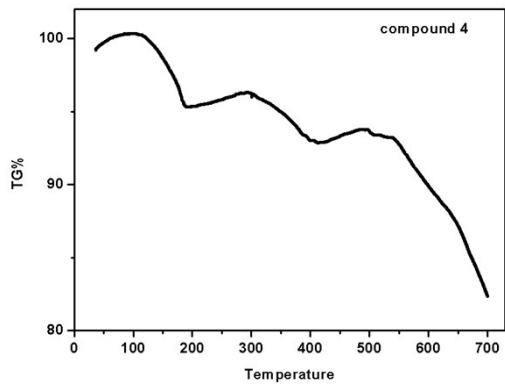

Compound 4

Figure. S6 IR spectra for 1 -5.

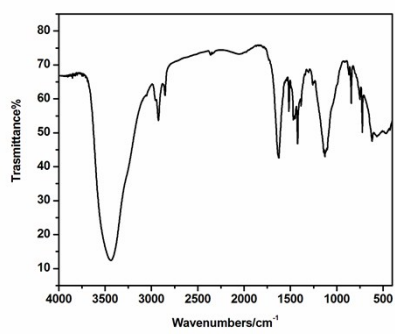

Compound 1

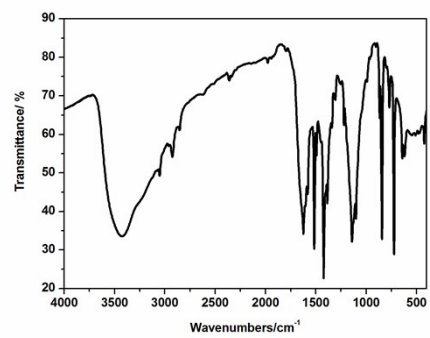

Compound 2



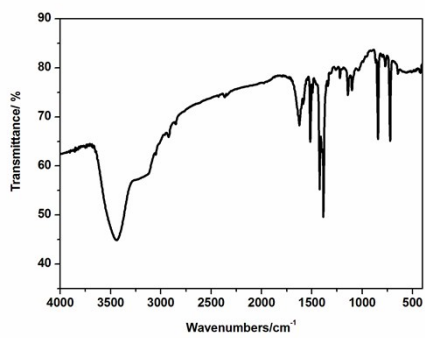

Compound 3

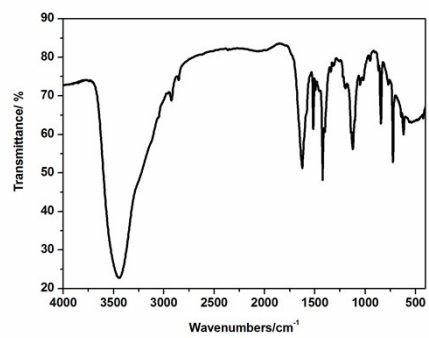

Compound 4

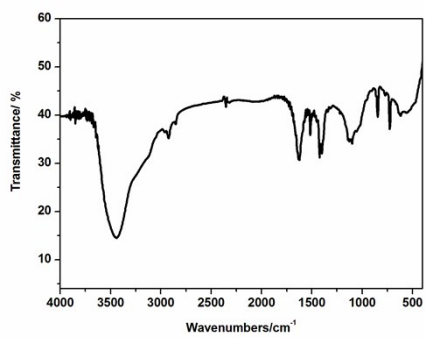

Compound 5

Figure. S7 IR spectra for 1 -5.
